# Supplementary material for: In situ preparation of hollow Mo2C–C hybrid microspheres as bifunctional electrocatalysts for oxygen reduction and evolution reactions
Source: Royal Society of Chemistry journal article supplement (doi:10.1039/c6ta04654a), 2016-01-01
Supplement: c6ta04654a1.pdf [file c6ta04654a1.pdf]

## Supporting Information

### ***In-situ* preparation of hollow Mo<sub>2</sub>C-C hybrids microspheres as bifunctional catalysts for oxygen reduction and evolution reactions**

Yong Luo<sup>a</sup>, Zhangjun Wang<sup>a</sup>, Yue Fu<sup>a</sup>, Chao Jin<sup>a, b\*</sup>, Qi Wei<sup>a</sup>, Ruizhi Yang<sup>a\*</sup>

<sup>a</sup> College of Physics, Optoelectronics and Energy & Collaborative Innovation Center  
of Suzhou Nano Science and Technology, Soochow University, Suzhou 215006,  
China.

<sup>b</sup> Institute of Chemical Power Sources, Zhangjiagang 215006, China

---

\* Corresponding author: Tel: +86 512 67875503  
E-mail: [jinchao@suda.edu.cn](mailto:jinchao@suda.edu.cn) (C. Jin); [yangrz@suda.edu.cn](mailto:yangrz@suda.edu.cn) (R. Yang)

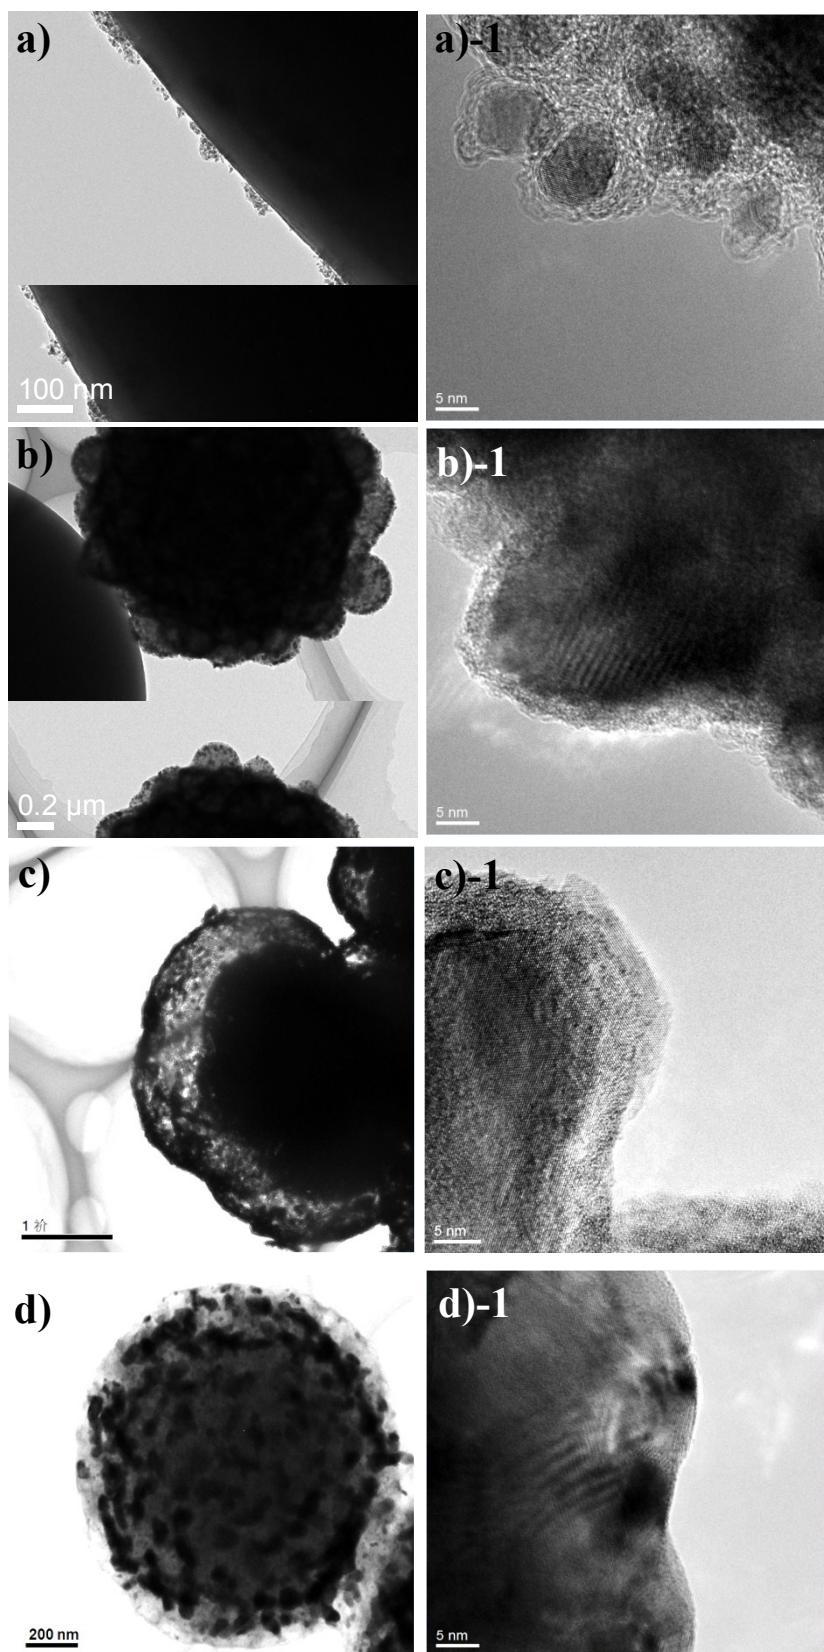

Fig. S1, TEM and HRTEM images of Mo<sub>2</sub>C-C-1 (a and a-1), Mo<sub>2</sub>C-C-5 (b and b-1), Mo<sub>2</sub>C-C-10 (c and c-1) and Mo<sub>2</sub>C-C-15 (d and d-1), respectively.
